# Supplementary material for: Sex Modifies the Impact of Type 2 Diabetes Mellitus on the Murine Whole Brain Metabolome
Source: MDPI journal article supplement (doi:10.3390/metabo13091012), 2023-09-14
Supplement: s1 [file s1]

## Supplemental Figures

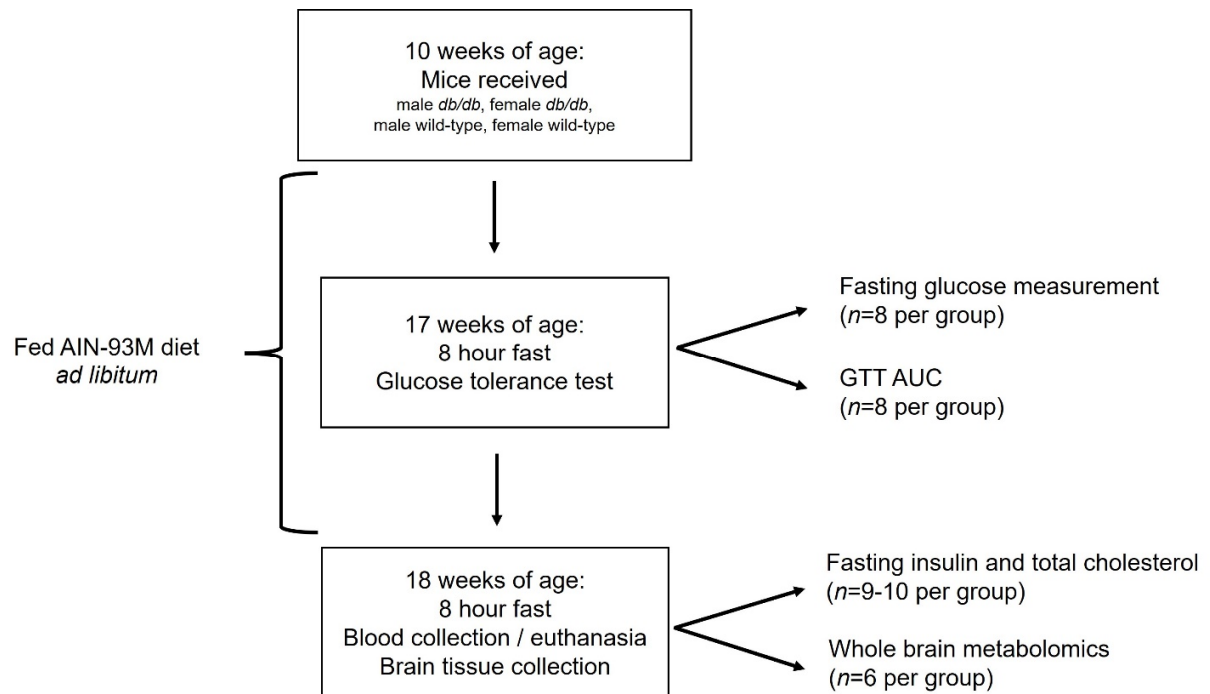

**Figure S1. Flow chart of experimental procedures.**

## Supplemental Tables

**Table S1. Mass spectrometry parameters.**

| <b>ESI mode</b>                 | <b>Positive</b> | <b>Negative</b> |
|---------------------------------|-----------------|-----------------|
| Heater temperature (°C)         | 300             | 300             |
| Sheath gas flow rate (arb)      | 45              | 45              |
| Auxillary gas flow rate (arb)   | 15              | 15              |
| Sweep gas flow rate (arb)       | 1               | 1               |
| Spray voltage (kV)              | 3.0             | 3.2             |
| Capillary temperature (°C)      | 350             | 350             |
| S-Lens radiofrequency level (%) | 30              | 60              |

ESI (electrospray ionization mode)

**Table S2. Brain metabolites significantly altered by *db/db* genotype in males.**

| Metabolite                                     | ESI mode | RT [min] | m/z      | FC       | log2(FC) | adjusted p-value |
|------------------------------------------------|----------|----------|----------|----------|----------|------------------|
| Dipalmitoylphosphatidylcholine                 | +        | 11.246   | 734.5676 | 0.035086 | -4.833   | 0.00096          |
| Sphingomyelin                                  | +        | 10.921   | 731.6034 | 0.043518 | -4.5223  | 0.007008         |
| PC 36:0; PC 18:0-18:0                          | -        | 14.502   | 834.6188 | 0.050049 | -4.3205  | 0.041655         |
| PC 20:3_20:3                                   | +        | 14.494   | 834.5971 | 0.063844 | -3.9693  | 0.011688         |
| PE 40:6; PE 20:3-20:3                          | +        | 14.493   | 792.5511 | 0.069856 | -3.8395  | 0.006273         |
| PC 32:0                                        | +        | 11.672   | 756.5489 | 0.13433  | -2.8962  | 0.00235          |
| SHexCer d36:1                                  | -        | 14.501   | 806.5446 | 0.18295  | -2.4505  | 0.00235          |
| PC(16:0/18:1)                                  | +        | 11.649   | 760.5817 | 0.21341  | -2.2283  | 0.000125         |
| PC 17:0_17:1                                   | +        | 14.494   | 760.582  | 0.23909  | -2.0644  | 0.01758          |
| NAGly 26:7/20:4                                | +        | 14.491   | 759.5716 | 0.23912  | -2.0642  | 0.01758          |
| PC 19:2_19:2                                   | +        | 11.282   | 810.5973 | 0.41885  | -1.2555  | 0.003322         |
| 2-Aminoadipic acid                             | -        | 0.795    | 160.0602 | 0.44941  | -1.1539  | 0.014885         |
| Phosphorylcholine                              | +        | 10.808   | 184.0736 | 0.4676   | -1.0966  | 0.000614         |
| PC 18:0_20:5                                   | +        | 11.656   | 808.579  | 0.4838   | -1.0475  | 0.005993         |
| LPC O-10:0                                     | +        | 10.92    | 398.2685 | 0.5505   | -0.86119 | 0.029106         |
| Glucosamine 6-phosphate                        | +        | 10.93    | 260.0527 | 0.59391  | -0.75168 | 0.003643         |
| 2-(hydroxymethyl)-4(3 <i>H</i> )-quinazolinone | +        | 3.878    | 177.0676 | 0.59775  | -0.74238 | 0.026041         |
| Pentamidine HCl                                | +        | 4.126    | 171.1042 | 0.61758  | -0.6953  | 0.030558         |
| Methylsuccinic acid                            | -        | 2.194    | 131.0336 | 0.62119  | -0.6869  | 0.006853         |
| DAG 22:1; DAG 9:0-13:1                         | +        | 9.52     | 444.3679 | 0.62328  | -0.68204 | 0.029106         |
| LPC O-16:1                                     | +        | 10.592   | 480.3444 | 0.63564  | -0.65372 | 0.038805         |
| CAR 16:1                                       | +        | 9.006    | 398.326  | 0.63675  | -0.65121 | 0.031875         |
| CAR 14:0                                       | +        | 8.752    | 372.3102 | 0.64262  | -0.63797 | 0.0118           |
| LPC 20:1                                       | -        | 11.772   | 594.377  | 0.646    | -0.63039 | 0.008589         |
| Palmitoylcarnitine                             | +        | 9.595    | 400.3414 | 0.65301  | -0.61483 | 0.005659         |
| 3-Hydroxy-3-methylglutaric acid                | -        | 1.597    | 161.0443 | 0.67202  | -0.57342 | 0.010942         |
| CAR 18:2                                       | +        | 9.29     | 424.3416 | 0.67283  | -0.57169 | 0.010942         |
| <i>N</i> -Methylleucine                        | -        | 9.597    | 144.1015 | 0.70215  | -0.51016 | 0.011688         |
| LPC 20:2                                       | -        | 10.882   | 592.361  | 0.71006  | -0.49399 | 0.00235          |
| CAR 17:0                                       | +        | 10.007   | 414.3572 | 0.72861  | -0.45679 | 0.039581         |
| PC 20:2e; PC 18:2e/2:0                         | +        | 10.684   | 548.3705 | 0.73131  | -0.45144 | 0.015824         |
| PC 12:0_12:0                                   | +        | 10.175   | 622.4426 | 0.73654  | -0.44116 | 0.009704         |
| Hydroxyglutaric acid                           | -        | 1.233    | 147.0285 | 0.74965  | -0.41572 | 0.039581         |
| Acetoacetate                                   | +        | 0.776    | 103.0394 | 0.7693   | -0.37839 | 0.002039         |
| 4-Nitro- <i>N</i> -phenylaniline               | -        | 9.176    | 213.0661 | 0.79324  | -0.33417 | 0.029106         |
| <i>N</i> -Acetyl-αglucosamine 1-phosphate      | -        | 0.897    | 300.0483 | 0.81863  | -0.28871 | 0.039919         |
| Acridine                                       | +        | 8.4      | 180.0807 | 1.1414   | 0.19082  | 0.039581         |
| 4-Oxoproline                                   | -        | 2.835    | 128.0339 | 1.1662   | 0.22184  | 0.019043         |

|                                          |   |        |          |        |         |          |
|------------------------------------------|---|--------|----------|--------|---------|----------|
| 2,4-dihydroxyheptadec-16-en-1-yl acetate | + | 10.285 | 311.2577 | 1.1694 | 0.22577 | 0.015824 |
| 1,4-dihydroxyheptadec-16-en-2-yl acetate | + | 10.531 | 311.2577 | 1.1705 | 0.22719 | 0.005642 |
| PA 28:4; PA 12:0-16:4                    | - | 10.547 | 583.3354 | 1.172  | 0.22898 | 0.01758  |
| Pulegone                                 | + | 10.691 | 153.1272 | 1.1847 | 0.24447 | 0.006695 |
| Phenol                                   | + | 9.018  | 95.04966 | 1.1959 | 0.25805 | 0.041671 |
| Cuminy alcohol                           | + | 10.567 | 133.1011 | 1.2024 | 0.26588 | 0.024581 |
| Myristic acid                            | - | 12.435 | 227.2009 | 1.2218 | 0.28903 | 0.017319 |
| Rhodiny Acetate                          | + | 12.176 | 199.1692 | 1.2232 | 0.2906  | 0.006695 |
| PA 22:3; PA 6:0-16:3                     | - | 7.909  | 501.257  | 1.2256 | 0.29346 | 0.017431 |
| PA 26:3; PA 10:0-16:3                    | - | 10.2   | 557.3198 | 1.2321 | 0.3011  | 0.008589 |
| Creatinine                               | - | 1.322  | 112.0501 | 1.2642 | 0.33823 | 0.024581 |
| N,N-Dimethylformamide                    | + | 4.177  | 74.0608  | 1.2645 | 0.33861 | 0.028589 |
| Norleucine                               | + | 1.456  | 132.102  | 1.2675 | 0.342   | 0.043771 |
| 2-Methoxycinnamaldehyde                  | + | 0.08   | 163.0752 | 1.2708 | 0.34568 | 0.030558 |
| 1-Methylxanthine                         | + | 5.292  | 167.0553 | 1.289  | 0.36625 | 0.014721 |
| Isoquinoline                             | + | 3.253  | 130.0653 | 1.2948 | 0.3727  | 0.005642 |
| Benzylamine                              | + | 0.096  | 108.0811 | 1.3216 | 0.40223 | 0.013696 |
| Diacetyl                                 | + | 0.045  | 87.04469 | 1.3378 | 0.41985 | 0.014721 |
| LPC O-18:2                               | + | 11.544 | 506.3601 | 1.3448 | 0.42743 | 0.002537 |
| FA 16:2                                  | - | 11.976 | 251.201  | 1.3494 | 0.43229 | 0.03866  |
| Aniline                                  | + | 0.092  | 94.06563 | 1.3934 | 0.47862 | 0.00694  |
| Orcinol                                  | + | 0.014  | 125.06   | 1.4043 | 0.48983 | 0.00096  |
| 2-Arachidonyl Glycerol ether             | + | 9.865  | 387.2891 | 1.4107 | 0.49641 | 0.039581 |
| Morpholine                               | + | 15.108 | 88.07627 | 1.4224 | 0.50833 | 0.038805 |
| Epinephrine                              | + | 2.854  | 184.0969 | 1.426  | 0.51195 | 0.004465 |
| Sarcosine                                | + | 2.85   | 90.05552 | 1.4356 | 0.52161 | 0.003643 |
| LPE 18:3                                 | + | 10.149 | 476.2739 | 1.4369 | 0.52299 | 0.008589 |
| Ethosuximide                             | + | 2.853  | 142.0863 | 1.437  | 0.52306 | 0.001994 |
| Linalool                                 | + | 10.689 | 155.1429 | 1.4398 | 0.52583 | 0.021203 |
| 4-Methoxyaniline                         | + | 2.852  | 124.0759 | 1.4401 | 0.5262  | 0.00096  |
| Nicotine                                 | + | 9.099  | 163.1228 | 1.4516 | 0.53768 | 0.00235  |
| Elaidic acid                             | + | 12.135 | 283.2629 | 1.4558 | 0.5418  | 0.002681 |
| Amphetamine                              | + | 3.25   | 136.1121 | 1.4559 | 0.54194 | 0.000585 |
| NAE 16:0                                 | + | 12.135 | 300.2895 | 1.4814 | 0.56694 | 0.041236 |
| Hexadecanamide                           | + | 12.633 | 256.2632 | 1.4979 | 0.58296 | 0.012432 |
| FA 16:3                                  | - | 11.557 | 249.1854 | 1.507  | 0.59171 | 0.038805 |
| Lauroylcarnitine                         | - | 11.607 | 342.2642 | 1.5096 | 0.59413 | 0.0118   |
| Betonicine                               | + | 2.853  | 160.0969 | 1.5149 | 0.59925 | 0.003565 |
| Muscione                                 | + | 12.135 | 239.2369 | 1.5391 | 0.6221  | 0.006082 |
| Camphor                                  | + | 12.882 | 153.1272 | 1.5551 | 0.63702 | 0.00096  |
| Nudifloramide                            | + | 1.666  | 153.0658 | 1.622  | 0.69775 | 0.028113 |
| Lupinine                                 | + | 12.881 | 170.1538 | 1.6421 | 0.71559 | 0.003322 |

|                                      |   |        |          |        |         |          |
|--------------------------------------|---|--------|----------|--------|---------|----------|
| 2,2,6,6-Tetramethyl-4 piperidone     | + | 12.882 | 156.1382 | 1.6615 | 0.73249 | 0.002751 |
| FA 16:4                              | - | 10.874 | 247.1697 | 1.7385 | 0.79787 | 0.028113 |
| Adipate                              | + | 12.911 | 147.0654 | 1.7653 | 0.8199  | 0.00235  |
| Docosatrienoic acid                  | - | 14.312 | 333.2797 | 1.8069 | 0.85355 | 0.003643 |
| 4-Hydroxy-2-quinolinecarboxylic acid | + | 11.279 | 190.0498 | 2.084  | 1.0593  | 0.034669 |
| Linolenic acid                       | - | 12.298 | 277.2168 | 2.1509 | 1.105   | 0.00235  |
| Corticosterone                       | - | 7.107  | 391.2122 | 2.2956 | 1.1989  | 0.005707 |
| Maytenin                             | + | 11.444 | 421.271  | 2.4919 | 1.3173  | 0.003322 |
| Vanillin-4-sulfate                   | - | 4.702  | 230.9962 | 2.4979 | 1.3207  | 0.002681 |
| Phenethylamine                       | + | 7.208  | 122.0965 | 2.632  | 1.3961  | 0.0118   |
| PC 18:1_18:1                         | + | 13.528 | 786.5991 | 2.8299 | 1.5007  | 0.008255 |
| 7-Oxocholesterol                     | + | 12.453 | 401.3416 | 2.9642 | 1.5677  | 0.00235  |
| 5'-methoxy aureol                    | + | 7.126  | 329.2107 | 3.0561 | 1.6117  | 0.003643 |
| PS 20:3_20:3                         | + | 14.503 | 836.5398 | 3.3632 | 1.7498  | 0.006695 |
| 7-Hydroxycoumarine                   | + | 6.988  | 163.0389 | 3.7989 | 1.9256  | 0.026569 |
| Neosolaniol                          | + | 12.627 | 383.1671 | 9.6082 | 3.2643  | 0.000125 |
| NAGly 10:0/10:0                      | + | 11.922 | 417.3358 | 16.415 | 4.0369  | 0.00235  |
| PC 18:1_18:2                         | + | 11.261 | 784.5834 | 23.565 | 4.5586  | 0.000381 |
| Ticagrelor                           | + | 10.658 | 523.191  | 43.72  | 5.4502  | 0.004056 |
| PI 11:0                              | + | 10.494 | 534.228  | 45.435 | 5.5057  | 0.00235  |
| Tyr-Tyr-Tyr                          | + | 10.149 | 508.2126 | 47.182 | 5.5602  | 0.005993 |
| PI 14:0                              | + | 10.569 | 576.2742 | 49.937 | 5.642   | 0.00096  |
| Taurocholic acid                     | - | 6.702  | 514.2836 | 50.811 | 5.6671  | 0.015739 |

FC: Fold change.

**Table S3. Brain metabolites significantly altered by *db/db* genotype in females.**

| Metabolite                                | ESI Mode | RT [min] | m/z      | FC      | log2(FC) | adjusted p-value |
|-------------------------------------------|----------|----------|----------|---------|----------|------------------|
| PC 18:0_18:1                              | +        | 11.638   | 788.6127 | 0.2172  | -2.2029  | 4.58E-06         |
| 2-Linoleoyl glycerol                      | +        | 14.497   | 337.2734 | 0.30721 | -1.7027  | 0.028217         |
| 2-Aminoadipic acid                        | -        | 0.795    | 160.0602 | 0.46148 | -1.1157  | 0.006595         |
| $\gamma$ -Aminobutyric Acid               | +        | 1.359    | 104.071  | 0.4856  | -1.0422  | 0.030053         |
| Methylsuccinic acid                       | -        | 2.194    | 131.0336 | 0.49951 | -1.0014  | 0.004157         |
| Thymidine                                 | -        | 2.552    | 241.0824 | 0.52379 | -0.93293 | 0.03038          |
| LysoPC(0:0/18:0)                          | +        | 11.543   | 562.3264 | 0.55467 | -0.8503  | 0.017979         |
| 2-Phenylphenate tetrahydrate              | +        | 4.206    | 171.0803 | 0.5842  | -0.77546 | 0.005078         |
| Hydroxyglutaric acid                      | -        | 1.233    | 147.0285 | 0.64985 | -0.62183 | 0.022241         |
| Ochrephilone                              | -        | 13.672   | 381.173  | 0.66983 | -0.57813 | 0.031932         |
| 3-Hydroxy-3-methylglutaric acid           | -        | 1.597    | 161.0443 | 0.67619 | -0.5645  | 0.013795         |
| CAR 18:1                                  | +        | 9.802    | 426.3571 | 0.67842 | -0.55976 | 0.040241         |
| 4-(Dimethylamino)phenylthiocyanate        | +        | 4.206    | 179.0621 | 0.6905  | -0.53429 | 0.024844         |
| 4-imidazoleacetic acid                    | +        | 4.208    | 165.0101 | 0.69359 | -0.52784 | 0.037552         |
| Triphenylphosphate                        | +        | 1.362    | 327.0794 | 0.70315 | -0.5081  | 0.01473          |
| 6-Fluorotryptophan                        | +        | 4.205    | 223.0889 | 0.70603 | -0.5022  | 0.037409         |
| CAR 17:0                                  | +        | 10.007   | 414.3572 | 0.71081 | -0.49246 | 0.0179           |
| Palmitoylcarnitine                        | +        | 9.595    | 400.3414 | 0.72701 | -0.45995 | 0.01473          |
| <i>N</i> -Methylaspartic acid             | +        | 1.354    | 148.0604 | 0.73527 | -0.44366 | 0.037409         |
| <i>N</i> -Acetyl-1-aspartylglutamic acid  | -        | 1.346    | 303.0828 | 0.73645 | -0.44135 | 0.02113          |
| Isosafrole                                | +        | 1.358    | 185.0557 | 0.76231 | -0.39155 | 0.037409         |
| 5-Hydroxymethyluridine                    | -        | 1.51     | 273.0724 | 0.76791 | -0.38099 | 0.037409         |
| Lumichrome                                | +        | 4.012    | 243.0877 | 0.78802 | -0.34369 | 0.027043         |
| Myosmine                                  | +        | 4.03     | 147.0918 | 0.80374 | -0.31521 | 0.045278         |
| PC 25:1                                   | +        | 7.363    | 656.4324 | 0.82787 | -0.27252 | 0.037892         |
| 4'-Methoxyacetophenone                    | +        | 8.609    | 151.0752 | 1.0914  | 0.12616  | 0.040241         |
| Phthalic acid                             | -        | 6.413    | 165.0181 | 1.1203  | 0.16385  | 0.022241         |
| 4-Oxoproline                              | -        | 2.835    | 128.0339 | 1.135   | 0.18274  | 0.027043         |
| 2-Ethyl-3-hydroxy-4 <i>H</i> -pyran-4-one | +        | 9.927    | 141.0546 | 1.1581  | 0.21179  | 0.01473          |
| 2-Deoxyglucose                            | -        | 0.09     | 163.0598 | 1.1756  | 0.23336  | 0.048103         |
| Hydroquinone                              | +        | 3.373    | 111.0444 | 1.1786  | 0.23713  | 0.029784         |
| Benzothiazole                             | +        | 6.383    | 136.0215 | 1.1815  | 0.24058  | 0.009049         |
| 4-Phenyl-3-buten-2-one                    | +        | 8.103    | 147.0804 | 1.1828  | 0.24218  | 0.012806         |
| Creatine                                  | +        | 0.792    | 132.0768 | 1.1856  | 0.24563  | 0.027043         |
| Dicyclohexylamine                         | +        | 4.828    | 182.1905 | 1.1886  | 0.24921  | 0.030148         |
| Taurine                                   | -        | 0.768    | 124.0059 | 1.1923  | 0.25373  | 0.015792         |
| 1-methylxanthine                          | +        | 5.292    | 167.0553 | 1.2118  | 0.27719  | 0.020466         |
| Dulcitol                                  | -        | 14.721   | 181.0706 | 1.216   | 0.28213  | 0.037409         |
| 2,3-Diaminopropionic acid                 | +        | 1.183    | 105.0701 | 1.2265  | 0.29453  | 0.025187         |

|                                      |   |        |          |        |         |          |
|--------------------------------------|---|--------|----------|--------|---------|----------|
| Iditol                               | - | 8.796  | 181.0705 | 1.2513 | 0.32346 | 0.012512 |
| 3-Methylpyrazole                     | + | 0.782  | 83.06102 | 1.2536 | 0.32609 | 0.0179   |
| Hexylamine                           | + | 8.498  | 102.1281 | 1.2727 | 0.34789 | 0.028217 |
| Diacetyl                             | + | 0.045  | 87.04469 | 1.2754 | 0.3509  | 0.027043 |
| Isobutylamine                        | + | 8.093  | 74.09717 | 1.3082 | 0.38753 | 0.025187 |
| Tropine                              | + | 5.94   | 142.1226 | 1.3185 | 0.39892 | 0.004157 |
| <i>N,N</i> -Dimethylformamide        | + | 4.177  | 74.0608  | 1.3712 | 0.45546 | 0.01473  |
| 4,4'-Sulfonyldiphenol                | - | 0.769  | 249.0213 | 1.4194 | 0.50532 | 0.015113 |
| 4-Hydroxy-2-quinolinecarboxylic acid | + | 11.279 | 190.0498 | 1.444  | 0.53005 | 0.030431 |
| Benzylamine                          | + | 0.096  | 108.0811 | 1.4535 | 0.53956 | 0.008572 |
| 6-Hydroxycaproic acid                | - | 4.348  | 131.07   | 1.4589 | 0.54488 | 0.008572 |
| Morpholine                           | + | 15.108 | 88.07627 | 1.4807 | 0.5663  | 0.013255 |
| 6-Pentyl-2 <i>H</i> -pyran-2-one     | + | 10.7   | 167.1066 | 1.4897 | 0.57501 | 0.037409 |
| Aniline                              | + | 0.092  | 94.06563 | 1.517  | 0.60118 | 0.005078 |
| Orcinol                              | + | 0.014  | 125.06   | 1.5806 | 0.66045 | 0.004157 |
| 2-Hydroxy-2-methylbutyric acid       | - | 3.279  | 117.0542 | 1.7003 | 0.76583 | 0.009049 |
| Nicotine                             | + | 9.099  | 163.1228 | 1.913  | 0.93582 | 0.027043 |
| FA 16:3                              | - | 11.557 | 249.1854 | 1.959  | 0.97014 | 0.02113  |
| Glycerol 3-phosphate                 | + | 11.14  | 173.0211 | 1.9644 | 0.97407 | 0.003107 |
| FA 16:2                              | - | 11.976 | 251.201  | 2.0015 | 1.0011  | 0.009049 |
| FA 16:4                              | - | 10.874 | 247.1697 | 2.1476 | 1.1027  | 0.027707 |
| Capryloyl glycine                    | - | 6.329  | 200.1281 | 2.154  | 1.107   | 0.03171  |
| NAGly 10:0/10:0                      | + | 11.922 | 417.3358 | 2.1855 | 1.128   | 0.019573 |
| Vanillin-4-sulfate                   | - | 4.702  | 230.9962 | 2.2512 | 1.1707  | 0.022241 |
| Linolenic Acid                       | - | 12.298 | 277.2168 | 4.1045 | 2.0372  | 0.009049 |
| Neosolaniol                          | + | 12.627 | 383.1671 | 38.199 | 5.2555  | 0.0179   |

FC: Fold change

**Table S4. Brain metabolites significantly different between female *db/db* and male *db/db* mice.**

| Metabolite                               | ESI mode | RT [min] | m/z      | FC       | log2(FC) | adjusted p-value |
|------------------------------------------|----------|----------|----------|----------|----------|------------------|
| PC 18:1_18:2                             | +        | 11.261   | 784.5834 | 0.042077 | -4.5708  | 0.000575         |
| Tyr-Tyr-Tyr                              | +        | 10.149   | 508.2126 | 0.2048   | -2.2877  | 0.040168         |
| PI 11:0                                  | +        | 10.494   | 534.228  | 0.24895  | -2.0061  | 0.029484         |
| Ticagrelor                               | +        | 10.658   | 523.191  | 0.2554   | -1.9692  | 0.040168         |
| PI 14:0                                  | +        | 10.569   | 576.2742 | 0.25772  | -1.9562  | 0.020368         |
| Neosolaniol                              | +        | 12.627   | 383.1671 | 0.41593  | -1.2656  | 0.020368         |
| 6-Hydroxycaproic acid                    | -        | 4.348    | 131.07   | 0.41809  | -1.2581  | 0.006379         |
| Maytenin                                 | +        | 11.444   | 421.271  | 0.48304  | -1.0498  | 0.020368         |
| Docosatrienoic acid                      | -        | 14.312   | 333.2797 | 0.56575  | -0.82175 | 0.02829          |
| Lauroylcarnitine                         | -        | 11.607   | 342.2642 | 0.6408   | -0.64206 | 0.020368         |
| Amphetamine                              | +        | 3.25     | 136.1121 | 0.6515   | -0.61817 | 0.000356         |
| Muscone                                  | +        | 12.135   | 239.2369 | 0.65944  | -0.60068 | 0.020924         |
| Pristimerin                              | +        | 11.552   | 487.2793 | 0.6609   | -0.5975  | 0.028808         |
| Adipate                                  | +        | 12.911   | 147.0654 | 0.66655  | -0.58521 | 0.036796         |
| Camphor                                  | +        | 12.882   | 153.1272 | 0.68546  | -0.54485 | 0.036796         |
| Elaidic acid                             | +        | 12.135   | 283.2629 | 0.70435  | -0.50564 | 0.020368         |
| Batyl Alcohol                            | +        | 11.469   | 367.3204 | 0.72597  | -0.46202 | 0.00118          |
| LPC O-18:2                               | +        | 11.544   | 506.3601 | 0.74841  | -0.4181  | 0.020368         |
| PA 22:3; PA 6:0-16:3                     | -        | 7.909    | 501.257  | 0.80341  | -0.31579 | 0.020368         |
| 1-Methylxanthine                         | +        | 5.292    | 167.0553 | 0.8137   | -0.29743 | 0.036404         |
| Rhodinyl Acetate                         | +        | 12.176   | 199.1692 | 0.82695  | -0.27414 | 0.048317         |
| 2,4-dihydroxyheptadec-16-en-1-yl acetate | +        | 10.285   | 311.2577 | 0.83887  | -0.25347 | 0.002948         |
| Caprylic acid                            | -        | 5.86     | 143.1064 | 0.84947  | -0.23536 | 0.047708         |
| 3-Hydroxypicolinic acid                  | -        | 14.513   | 138.0182 | 0.86273  | -0.21303 | 0.020368         |
| 1,4-dihydroxyheptadec-16-en-2-yl acetate | +        | 10.531   | 311.2577 | 0.86392  | -0.21104 | 0.040168         |
| 3,7-Epoxyecaryophyllan-6-One             | +        | 3.767    | 275.1422 | 0.88006  | -0.18432 | 0.039901         |
| Carbazochrome sulfonate                  | +        | 1.971    | 301.0585 | 0.8824   | -0.1805  | 0.039901         |
| Erythronolactone                         | -        | 2.459    | 117.0179 | 0.89537  | -0.15944 | 0.011457         |
| Palmitic acid                            | -        | 6.068    | 255.2324 | 0.89725  | -0.15642 | 0.028808         |
| Piperonylic Acid                         | -        | 10.166   | 165.0182 | 0.899    | -0.1536  | 0.039901         |
| Phthalic acid                            | -        | 6.413    | 165.0181 | 0.90846  | -0.13851 | 0.028808         |
| 9-Fluorenone                             | +        | 7.617    | 181.0644 | 0.90906  | -0.13756 | 0.042721         |
| Sarcosine                                | +        | 2.85     | 90.05552 | 1.1509   | 0.20271  | 0.048317         |
| Epinephrine                              | +        | 2.854    | 184.0969 | 1.181    | 0.24004  | 0.040168         |
| 4-Nitro-N-phenylaniline                  | -        | 9.176    | 213.0661 | 1.2377   | 0.30768  | 0.035449         |
| LPC O-16:1                               | +        | 10.592   | 480.3444 | 1.2405   | 0.31096  | 0.035449         |
| PC 12:0_12:0                             | +        | 10.175   | 622.4426 | 1.2719   | 0.34701  | 0.030274         |



|                         |   |        |          |        |         |          |
|-------------------------|---|--------|----------|--------|---------|----------|
| Linoleic acid           | - | 12.929 | 279.2324 | 1.2818 | 0.35818 | 0.033134 |
| LPE 20:3                | - | 10.163 | 502.2932 | 1.3656 | 0.44954 | 0.045678 |
| Xanthohumol             | - | 12.666 | 353.1421 | 1.3737 | 0.45802 | 0.035449 |
| LPC 18:2                | + | 9.79   | 520.3393 | 1.4297 | 0.51568 | 0.009787 |
| 3-Hydroxybutyric acid   | - | 1.815  | 103.0386 | 1.4981 | 0.58317 | 0.040168 |
| FA 16:2                 | - | 11.976 | 251.201  | 1.5379 | 0.62096 | 0.002948 |
| tetradec-5-ynoic acid   | - | 10.964 | 223.1695 | 1.551  | 0.63319 | 0.030274 |
| LPC 22:5                | - | 10.065 | 614.3456 | 1.6388 | 0.71266 | 0.028362 |
| Pefloxacin              | + | 4.058  | 334.1608 | 1.6506 | 0.72296 | 0.029929 |
| NAGly 10:0/10:0         | + | 11.922 | 417.3358 | 1.7037 | 0.76866 | 0.036796 |
| Glucosamine 6-phosphate | + | 10.93  | 260.0527 | 1.7966 | 0.84528 | 0.030274 |
| Phosphorylcholine       | + | 10.808 | 184.0736 | 1.9453 | 0.95997 | 0.02667  |
| Linolenic Acid          | - | 12.298 | 277.2168 | 2.1659 | 1.115   | 0.011457 |
| PC 19:2_19:2            | + | 11.282 | 810.5973 | 2.1771 | 1.1224  | 0.035449 |
| 14-Benzoyltalatzamine   | + | 9.675  | 526.313  | 2.5241 | 1.3358  | 0.035449 |
| PE 40:6; PE 20:3-20:3   | + | 14.493 | 792.5511 | 24.877 | 4.6367  | 0.035449 |
| Sphingomyelin           | + | 10.921 | 731.6034 | 27.358 | 4.7739  | 0.002948 |

FC: Fold Change

**Table S5. Brain metabolites significantly different between female WT and male WT mice.**

| Metabolite                     | ESI | RT [min] | m/z      | FC      | log2(FC) | adjusted p-value |
|--------------------------------|-----|----------|----------|---------|----------|------------------|
| 2-Hydroxy-2-methylbutyric acid | -   | 3.279    | 117.0542 | 0.32518 | -1.6207  | 0.002828         |
| 6-Hydroxycaproic acid          | -   | 4.348    | 131.07   | 0.3475  | -1.5249  | 0.002828         |
| Glycerol 3-phosphate           | +   | 11.14    | 173.0211 | 0.63211 | -0.66175 | 0.014628         |
| Aniline                        | +   | 0.092    | 94.06563 | 0.77823 | -0.36174 | 0.00773          |
| Allose                         | -   | 6.071    | 161.0443 | 0.83312 | -0.26341 | 0.012909         |
| Isovaleric acid                | +   | 2.849    | 103.0758 | 1.4037  | 0.4892   | 0.00773          |
| Methylsuccinic acid            | -   | 2.194    | 131.0336 | 1.4585  | 0.5445   | 0.041096         |
| 4-Methoxyaniline               | +   | 2.852    | 124.0759 | 1.5192  | 0.60335  | 0.005791         |
| 2-Phenylphenate tetrahydrate   | +   | 4.206    | 171.0803 | 1.542   | 0.62477  | 0.012909         |
| Ethosuximide                   | +   | 2.853    | 142.0863 | 1.5469  | 0.62939  | 0.002828         |
| Epinephrine                    | +   | 2.854    | 184.0969 | 1.5572  | 0.63898  | 0.00773          |
| Sarcosine                      | +   | 2.85     | 90.05552 | 1.5943  | 0.67288  | 0.005791         |
| Betonicine                     | +   | 2.853    | 160.0969 | 1.6318  | 0.70642  | 0.012909         |
| Pantothenic acid               | -   | 2.84     | 218.1025 | 1.6472  | 0.72003  | 0.00773          |
| Olmesartan                     | -   | 2.84     | 445.1991 | 2.1675  | 1.116    | 0.032185         |

FC: Fold change
